# Supplementary material
Source: JCI journal article supplement (doi:10.1172/jci191979)

Figure 2F

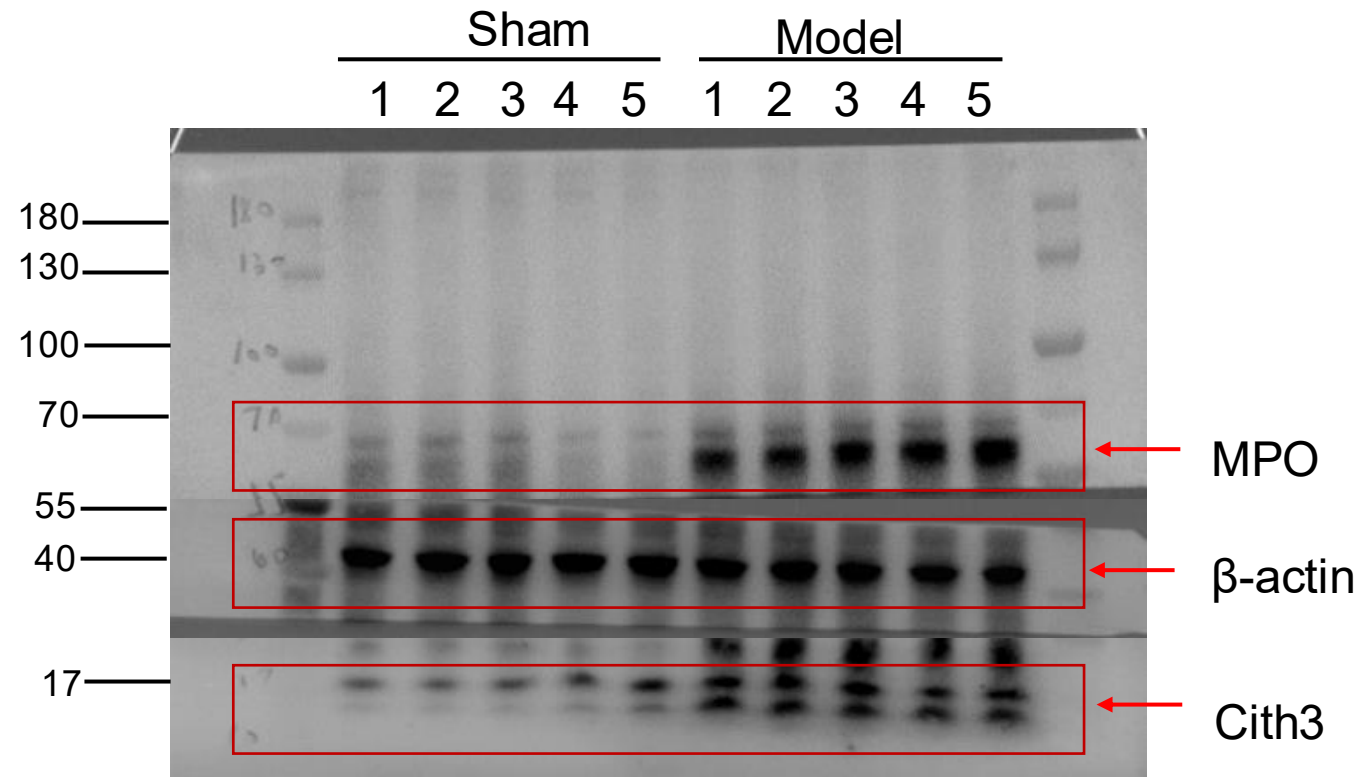

Figure 2G

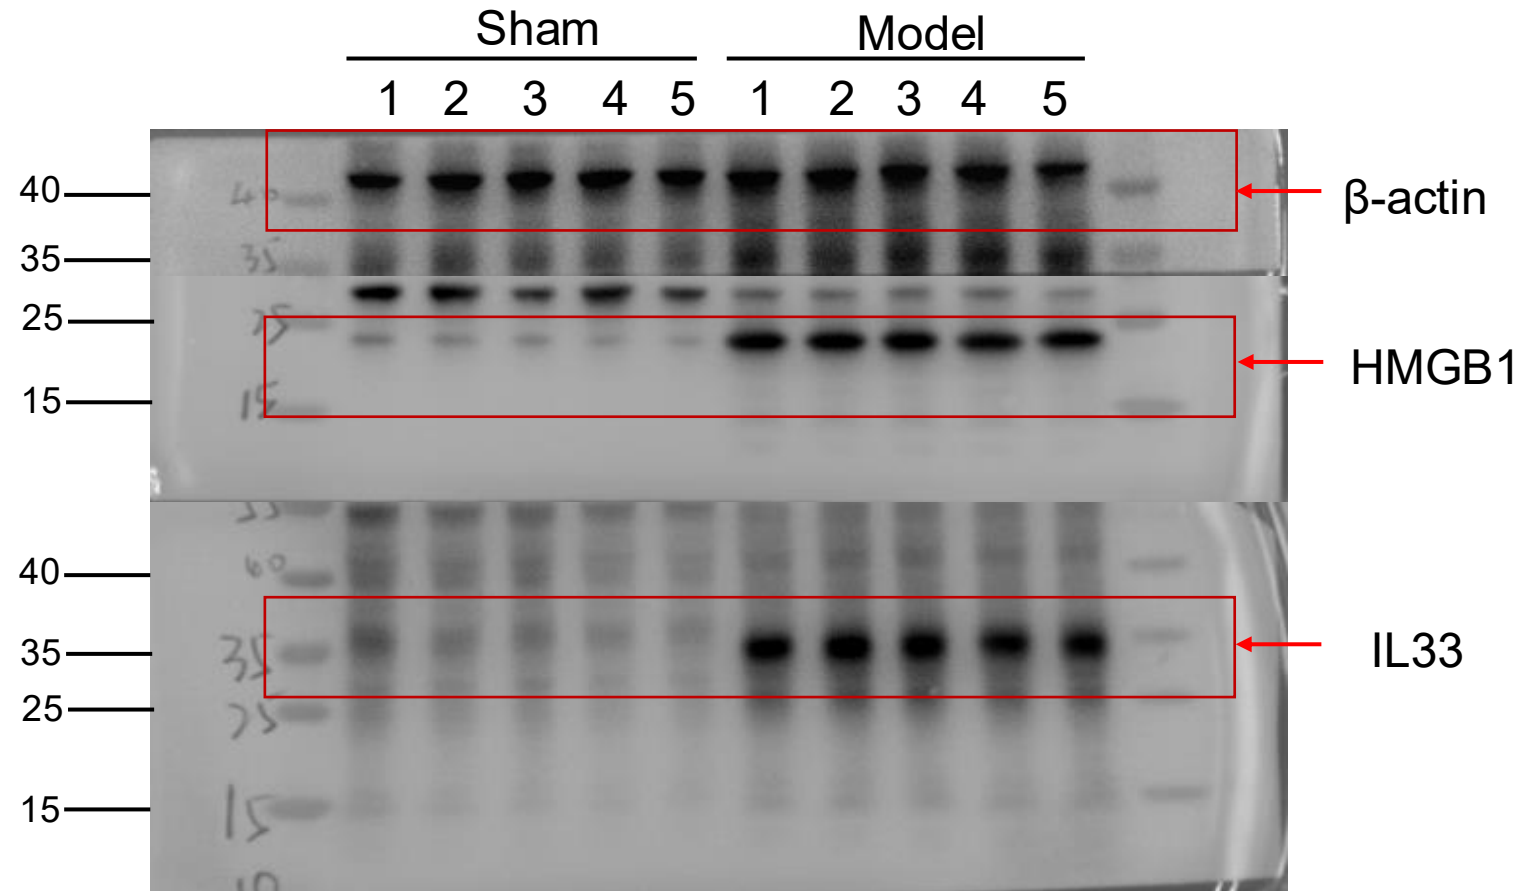



Figure 5A

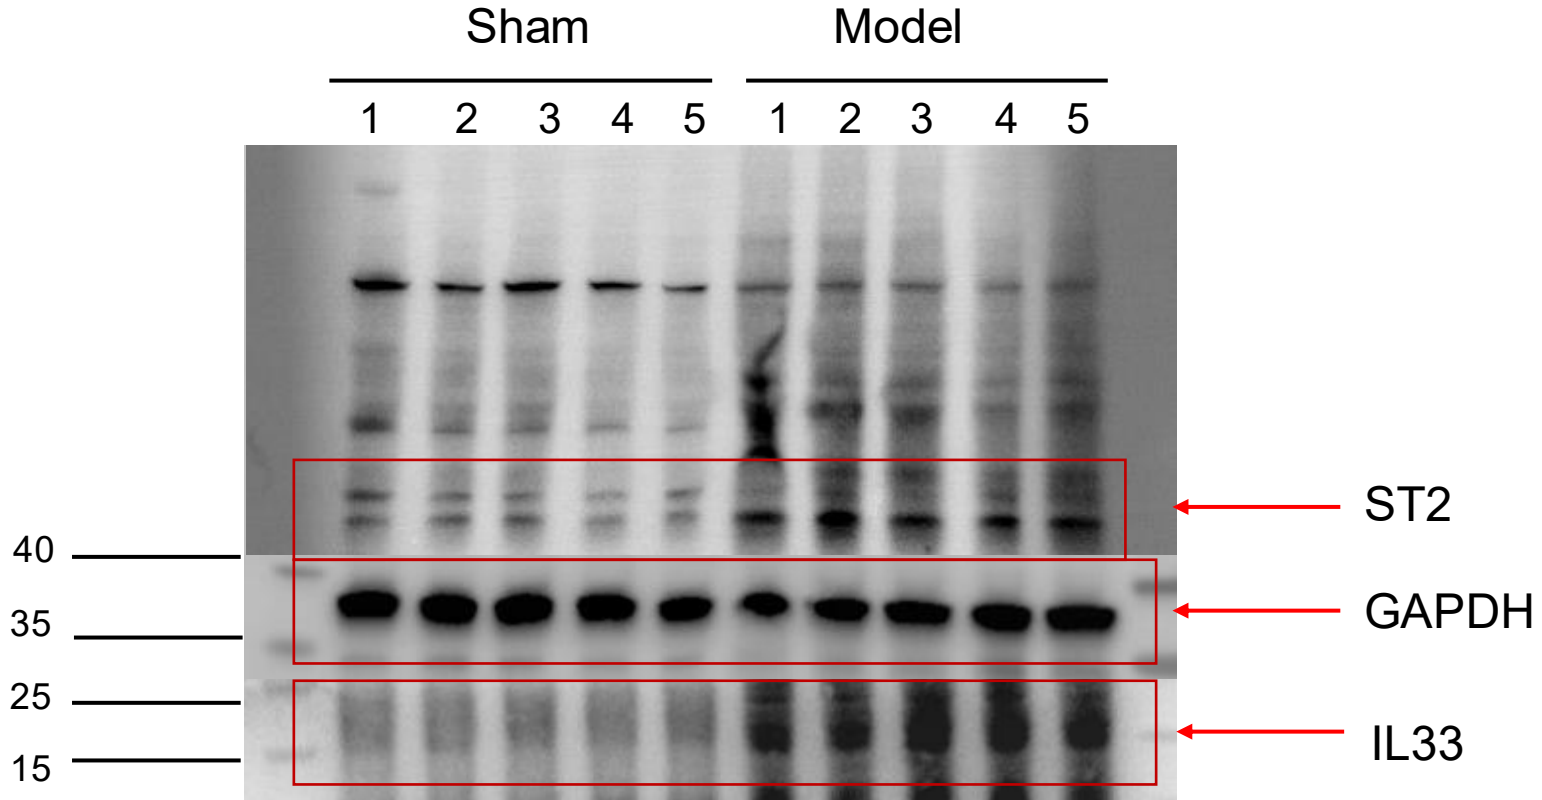

Figure 5J

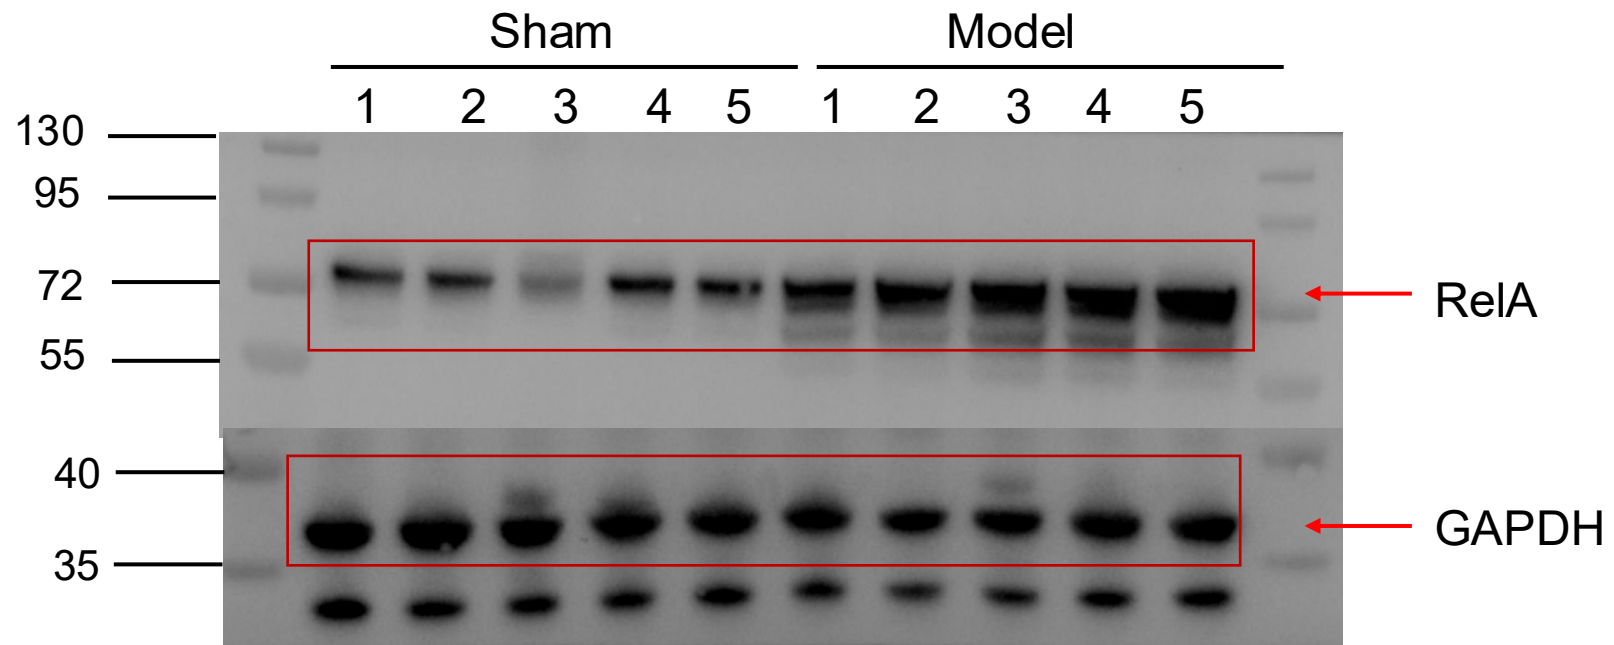

Figure 6K

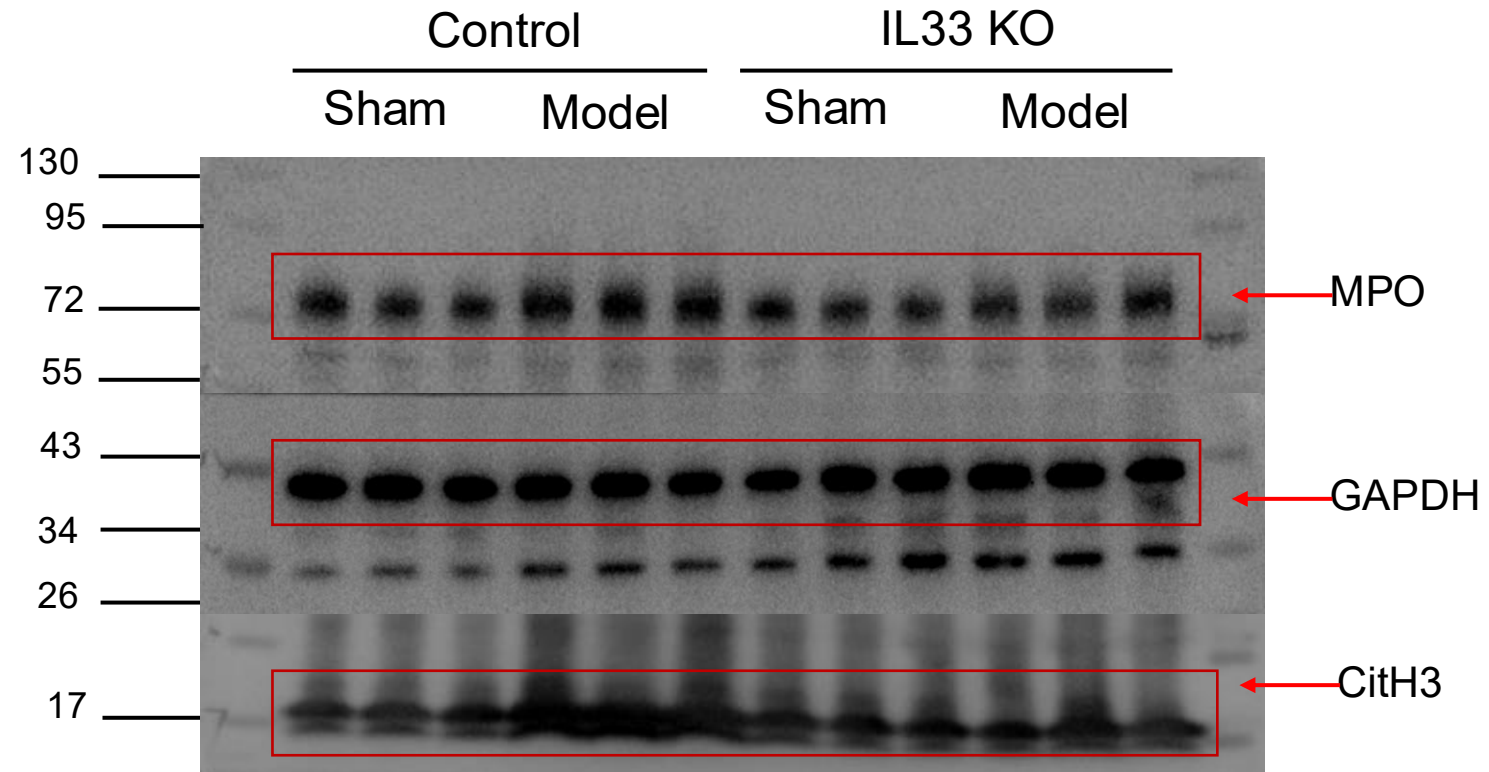

Figure 6N

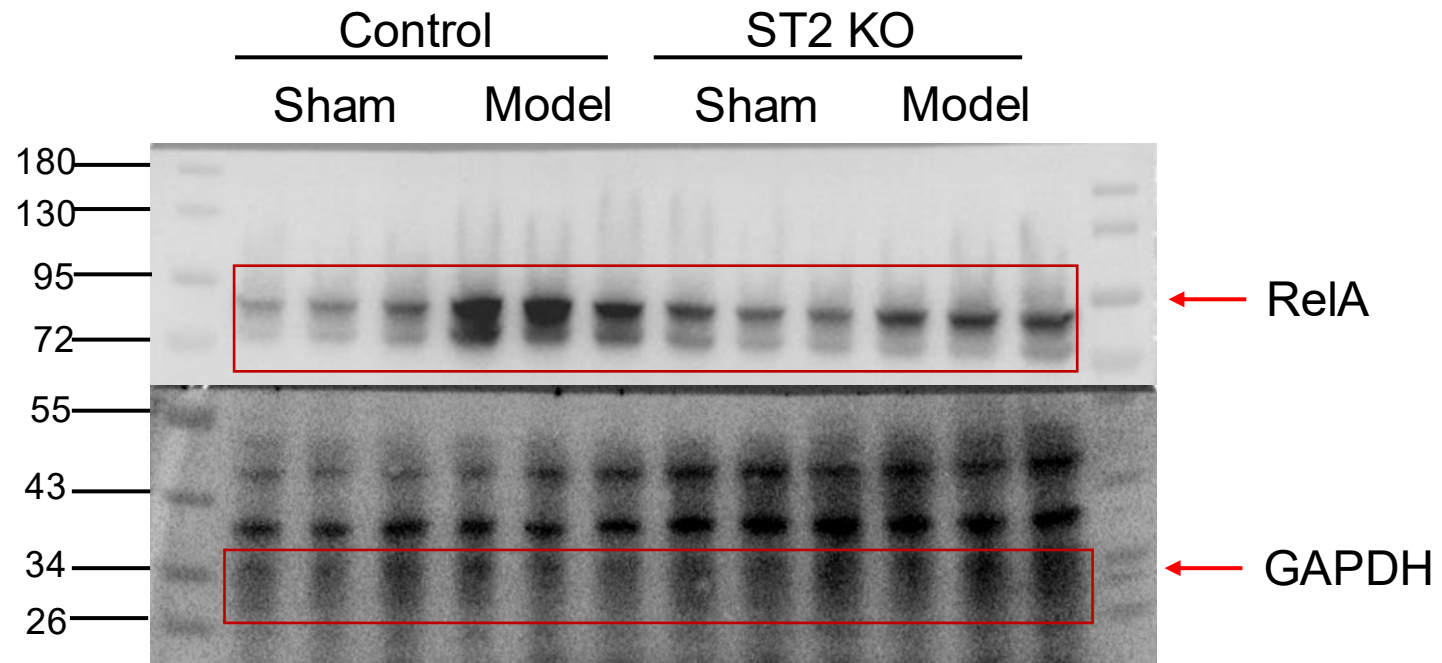

Figure 9L

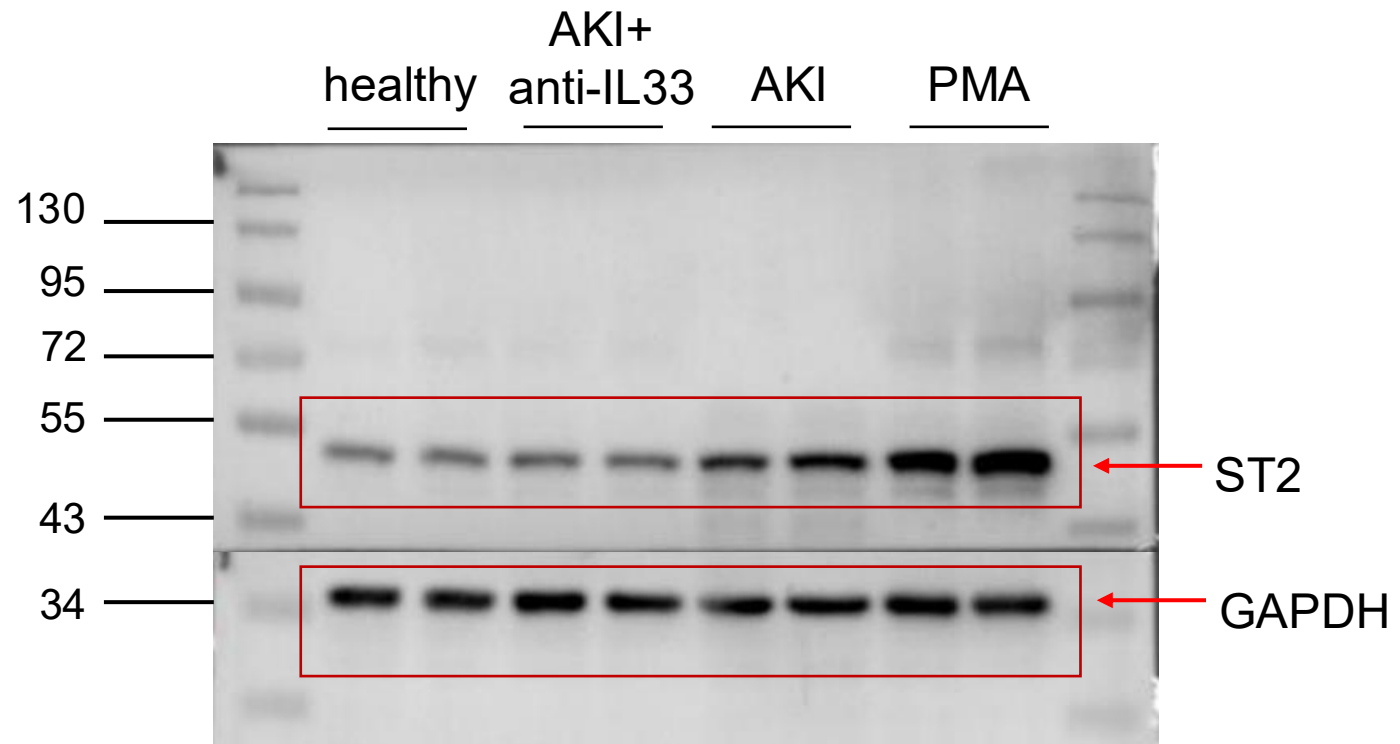

# Supplemental Figure 6M

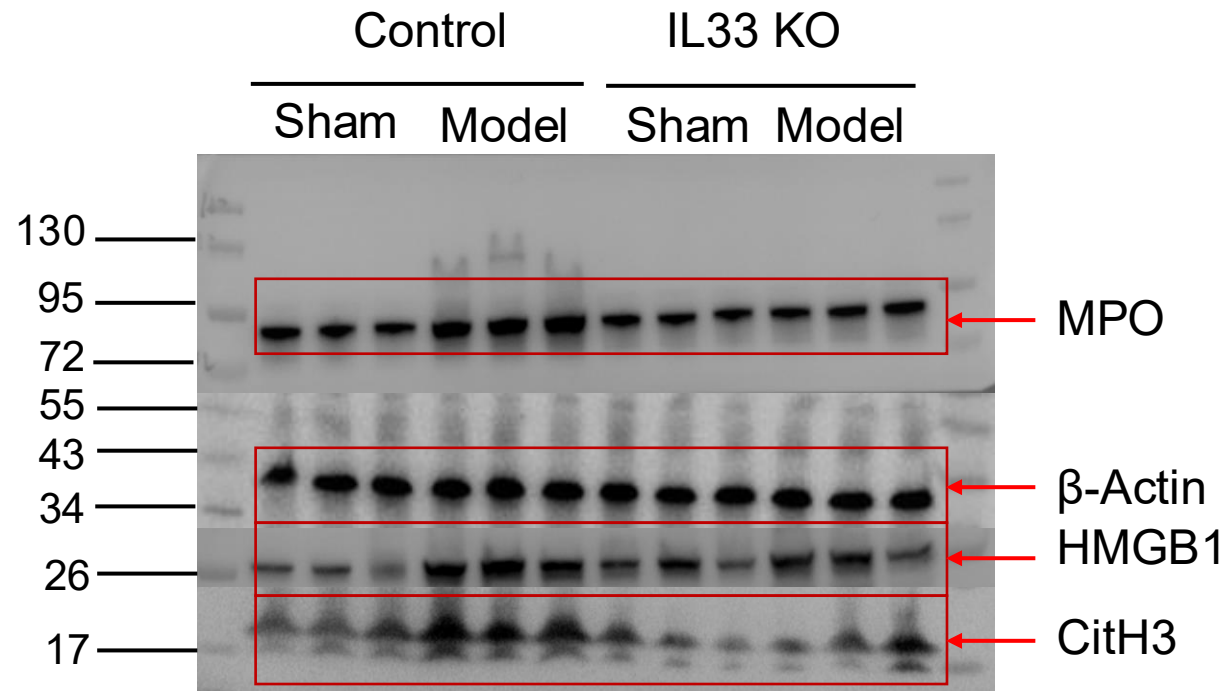

Supplement: sd2 [file 2]
